# Supplementary material
Source: publisher figshare collection journal article supplement (https://tandf.figshare.com/ndownloader/files/17480153)
Supplement: Supplementary file 1 [file 17480153]

**Supplementary Material**

Table S1 Comparison of results of biochar assisted phytoremediation.

Table S1

Comparison of results of biochar assisted phytoremediation

| **Types of soil plant and biochar feedback** | | | | | **Result of remediation** | | | |  |
| --- | --- | --- | --- | --- | --- | --- | --- | --- | --- |
| Metals | Plant for remediation | Hyperaccumulator | feedback | pH of soils | Plant growth | Metal availability | | Plant uptake | References |
| As | *Lolium perenne L.* | **×** | willow | 5.6 | promoted | Unaffected | | Promoted | (Gregory et al., 2014) |
| As | *Miscanthus* | **×** | hardwoods | 7.06  6.98  8.49 | promoted | Increased | | Promoted | (Hartley et al., 2009) |
| Cd,  Cu, Mn,  Ni,  Pb,  Zn | *Lolum multiflorum Lam* | **×** | crop residues  (walnut shells (WS), corn cobs (CC), corn straws (CS), and rice straw) | 7.96 | — | Unaffected(Cu,P，Cd,Mn(CC,CS)).  Increased (Zn,Mn(RS)).  Decreased (Ni,Mn(WS)). | | Promoted (Mn);  reduced (Cd, Cu, Ni, Pb, and Zn); | (Zhang et al., 2016) |
| Cd,  Cr,  Cu, Ni,  Pb,  Zn | *Anthyllis vulneraria subsp, polyphylla (Dc.), Nyman, Noccaea rotundifolium (L.)* | **×** | orchards (ROM); fir tree pellets (ABE); manure pellets (70%) mixed with fir tree pellets (30%) (MAN) | 7.76 | Unaffected or promoted | Unaffected (Cr, Cu, Ni, Pb, Zn (ABE)).  Decreased (Cd (MAN-ROM)). | | (root of all plants)  unaffected or promoted (Cd, Pb, Zn ) | (Fellet et al., 2014) |
| Cu, Pb | *Lolium perenne L. var. Cadix)* | **×** | British Oak, Ash, Sycamore and Birch (supplied by Bodfari Charcoal, Denbigh, North Wales, UK) was mixed at 20% | 5.4 | Promoted | | Decreased | Reduced | (Karami et al., 2011) |
| Pb | *Moringa oleifera* | **×** | Rice husk and (RSB) groundnut shell (GSB) | 5.6 | promoted | — | | Reduced | (Ogundiran et al., 2018) |
| Cd | *Cichorium intybus* | **×** | Rice straw | 4.38 | unaffected | | Unaffected | unaffected | (Xiao et al., 2018) |
| Cu,  Zn,  Cd,  Pb | *Jatropha curcas L.* | **×** | Corn | 6.0 | unaffected | | Increased | Promoted (Zn) unaffected (Cu, Cd,Pb) | (Gonzalez-Chavez et al., 2017) |
| Cr,  Ni,  As,  Cd,  Pb,  Zn | *Medicago sativa L.* | **×** | Rice husk | 6.68 | promoted | | Decreased (Cr, Pb, Zn).  Promoted or unaffected (Ni, As Cd). | Promoted(Cr,As)  Reduced(Ni, Cd, Pb, Zn) | (Ibrahim et al., 2016) |
| Cd,  Zn | *Noccaea caerulescens* | **√** |  | 5.89,  8.07 | Unaffected | | Decreased | Promoted in acid soil，unaffected in alkaline soil | (Rees et al., 2015) |
| *Lolium perenne* | **×** |  | Promoted in acid soil，unaffected in alkaline soil | | Reduced |
| Cd,  Zn | *Sedum plumbizincicola* | **√** | Corn straw | 3.57(spiked soil) | Decreased | | Decreased | Promoted | (Li et al., 2018) |
| Cd,  Zn | *Noccaea caerulescens* | **√** | A mix of hardwood and softwood | 5.90,8.04 | promoted | | — | unaffected | (Rees et al., 2016) |
| *Zea mays* | **×** | promoted | | Reduced in alkaline soil, unaffected in acid soil |
| *Lolium perenne* | **×** |  |  |  | | Reduced in acid soil, unaffected in alkaline soil |
| As | *Pteris vittata* | **√** | Hardwood | 6.2 | Promoted | | — | Promoted | (de Oliveira et al., 2017) |
| *Lactuca sativa L* | **×** | Promoted | | Reduced |

# References

de Oliveira, L.M., Suchismita, D., Gress, J., Rathinasabapathi, B., Chen, Y.S., Ma, L.N.Q., 2017. Arsenic uptake by lettuce from As-contaminated soil remediated with Pteris vittata and organic amendment. Chemosphere 176, 249-254.

Fellet, G., Marmiroli, M., Marchiol, L., 2014. Elements uptake by metal accumulator species grown on mine tailings amended with three types of biochar. Sci Total Environ 468, 598-608.

Gonzalez-Chavez, M.D.C.A., Carrillo-Gonzalez, R., Godinez, M.I.H., Lozano, S.E., 2017. Jatropha curcas and assisted phytoremediation of a mine tailing with biochar and a mycorrhizal fungus. Int J Phytoremediat 19, 174-182.

Gregory, S.J., Anderson, C.W.N., Arbestain, M.C., McManus, M.T., 2014. Response of plant and soil microbes to biochar amendment of an arsenic-contaminated soil. Agr Ecosyst Environ 191, 133-141.

Hartley, W., Dickinson, N.M., Riby, P., Lepp, N.W., 2009. Arsenic mobility in brownfield soils amended with green waste compost or biochar and planted with Miscanthus. Environ Pollut 157, 2654-2662.

Ibrahim, M., Khan, S., Hao, X., Li, G., 2016. Biochar effects on metal bioaccumulation and arsenic speciation in alfalfa (Medicago sativa L.) grown in contaminated soil. Int J Environ Sci Te 13, 2467-2474.

Karami, N., Clemente, R., Moreno-Jimenez, E., Lepp, N.W., Beesley, L., 2011. Efficiency of green waste compost and biochar soil amendments for reducing lead and copper mobility and uptake to ryegrass. J Hazard Mater 191, 41-48.

Li, Z., Jia, M.Y., Christie, P., Ali, S., Wu, L.H., 2018. Use of a hyperaccumulator and biochar to remediate an acid soil highly contaminated with trace metals and/or oxytetracycline. Chemosphere 204, 390-397.

Ogundiran, M.B., Mekwunyei, N.S., Adejumo, S.A., 2018. Compost and biochar assisted phytoremediation potentials of Moringa oleifera for remediation of lead contaminated soil. J Environ Chem Eng 6, 2206-2213.

Rees, F., Germain, C., Sterckeman, T., Morel, J.L., 2015. Plant growth and metal uptake by a non-hyperaccumulating species (Lolium perenne) and a Cd-Zn hyperaccumulator (Noccaea caerulescens) in contaminated soils amended with biochar. Plant Soil 395, 57-73.

Rees, F., Sterckeman, T., Morel, J.L., 2016. Root development of non-accumulating and hyperaccumulating plants in metal-contaminated soils amended with biochar. Chemosphere 142, 48-55.

Xiao, Y., Li, Y., Che, Y.Y., Deng, S.J., Liu, M.H., 2018. Effects of biochar and nitrogen addition on nutrient and Cd uptake of Cichorium intybus grown in acidic soil. Int J Phytoremediat 20, 398-404.

Zhang, G.X., Guo, X.F., Zhao, Z.H., He, Q.S., Wang, S.F., Zhu, Y., Yan, Y.L., Liu, X.T., Sun, K., Zhao, Y., Qian, T.W., 2016. Effects of biochars on the availability of heavy metals to ryegrass in an alkaline contaminated soil. Environ Pollut 218, 513-522.
